# Supplementary material for: Vagus Nerve Stimulation Reduces Indomethacin-Induced Small Bowel Inflammation
Source: PubMed Central journal article supplement (PMC8789651; doi:10.3389/fnins.2021.730407), 2022-01-12
Supplement: Table_1.pdf [file Table_1.pdf]

**SUPPLEMENTARY TABLE 1**

| <b>Analyte</b> | <b>Sham</b>         |            | <b>VNS</b>          |            | <b>t-test</b> |
|----------------|---------------------|------------|---------------------|------------|---------------|
|                | <b>Mean (pg/mg)</b> | <b>SEM</b> | <b>Mean (pg/mg)</b> | <b>SEM</b> |               |
| IFN- $\gamma$  | 19.4                | 5.3        | 6.0                 | 2.0        | p = 0.03 *    |
| IL-1 $\beta$   | 685.5               | 219.7      | 172.2               | 42.8       | p = 0.03 *    |
| IL-4           | 3.1                 | 1.0        | 0.7                 | 0.3        | p = 0.04 *    |
| IL-5           | 38.0                | 7.8        | 33.7                | 14.2       | p = 0.4       |
| KC             | 1902.7              | 688.0      | 969.2               | 285.0      | p = 0.1       |
| TNF            | 75.0                | 20.9       | 41.0                | 12.0       | p = 0.1       |
